# Supplementary material
Source: ML conference proceedings conference paper supplement (https://openaccess.thecvf.com/content/CVPR2025/html/Meng_Closest_Neighbors_are_CVPR_2025_paper.html)
Supplement: Supplementary file 1 [file Meng_Closest_Neighbors_are_CVPR_2025_supplemental.pdf]

# Closest Neighbors are Harmful for Lightweight Masked Auto-encoders

## Supplementary Material

### 7. Repelling Random Patches vs. Repelling Closest Neighbor Patches

We are fully aware of the trend of employing randomly asymmetrical masks to the input of the MAE training [18, 39]. We further evaluate the impact of incorporating the random asymmetry while applying the proposed repelling learning scheme (Eq. 2 and Eq. 3). Specifically, the inputs are two sets of randomly selected patches with the same sparsity, we compute the same repelling loss based on Eq. 2 and Eq. 3 after the default encoding and decoding.

Table 8. Performance comparison between random asymmetrical masks and the proposed NoR-MAE.

| ViT Model | Method                        | ImageNet-100 Accuracy (%) |
|-----------|-------------------------------|---------------------------|
| ViT-Tiny  | Random Asymmetry              | 72.15                     |
|           | Neighbor Repelling (Proposed) | <b>78.26</b>              |
| ViT-Small | Random Asymmetry              | 82.04                     |
|           | Neighbor Repelling (Proposed) | <b>84.28</b>              |

As shown in Table 8, repelling the random information cannot fully resolve the poor learnability of the lightweight model. The superior accuracy of the proposed Neighbor-Repelling scheme further proves the necessity of understanding the semantic differences between different local information (neighbor-based centroid).

### 8. Minimize the Distance Between Patches and their Closest Neighbors

Although the proposed method highlights the necessity of repelling the closest neighbor, the similarity between patches and their closest neighbors should be ignored. Based on the setup of the closest neighborhood patches (CNP) introduced in Section 3.1, we perform the MAE training scheme by minimizing the distance between the unmasked patches and their CNP. Mathematically, we modify Eq. 2 to Neighbor Alignment Loss (NoA):

$$\mathcal{L}_{\text{NoA}} = \frac{1}{NDK} \sum_{N,D,K} (\bar{Z} - \bar{Z}_{\text{CNP}})^2 \quad (4)$$

And the total loss is:

$$\mathcal{L}_{\text{total}} = \mathcal{L}_2(\bar{Z}, \text{Ground Truth}) + \lambda_{\text{NoA}} \cdot \mathcal{L}_{\text{NoA}} \quad (5)$$

Which is equivalent to minimizing the Mean Square distance between patches and their CNP. As shown in Table 9, the performance boost with Neighbor Alignment (NoA)

Table 9. Comparison between Neighbor Repelling and Neighbor Alignment for MAE training.

| ViT Model | Method                          | ImageNet-100 Accuracy (%) |
|-----------|---------------------------------|---------------------------|
| ViT-Tiny  | MAE [20]                        | 71.04                     |
|           | Neighbor Alignment (NoA)        | 72.52                     |
|           | <b>Neighbor Repelling (NoR)</b> | <b>78.26</b>              |

is unsatisfactory compared to the proposed Neighbor Repelling. Given that only 20% of the patches are extremely similar (similarity  $\geq 0.99$ ) to their closest neighbor patches (CNP) (Figure 3), minimizing the distance between each patch and their CNP ignores the dissimilarity of the CNP, which leads to the sub-optimal performance.

Table 10. Performance and training cost comparison between NoR-MAE and the knowledge distillation-based MAE training (DMAE) with the ImageNet-1K dataset (based on RTX 6000 GPU).

| ViT Model | Method                     | Teacher    | Total GPU Memory (GB)                | Time per Epoch        | FT Acc. (%)  |
|-----------|----------------------------|------------|--------------------------------------|-----------------------|--------------|
| ViT-Tiny  | MAE [20]                   | N/A        | 102 (1 $\times$ )                    | 35 min (4 GPU)        | 66.60        |
|           | DMAE [3]                   | ViT-B      | 152 (1.49 $\times$ )                 | 43 min (4 GPU)        | 70.00        |
|           | <b>NoR-MAE (This work)</b> | <b>N/A</b> | <b>108 (1.08<math>\times</math>)</b> | <b>36 min (4 GPU)</b> | <b>70.24</b> |
| ViT-Small | MAE [20]                   | N/A        | 144 (1 $\times$ )                    | 45 min (4 GPU)        | 79.00        |
|           | DMAE [3]                   | ViT-B      | 218 (1.5 $\times$ )                  | 1 hr 2 min (4 GPU)    | 79.30        |
|           | <b>NoR-MAE (This work)</b> | <b>N/A</b> | <b>152 (1.06<math>\times</math>)</b> | <b>47 min (4 GPU)</b> | <b>80.13</b> |

### 9. Training Cost of NoR-MAE

We profiled and compare the training cost of the vanilla MAE, distillation-based DMAE, and the proposed NoR-MAE algorithm. As shown in Table 10, the proposed method outperforms DMAE [3] with better accuracy and 1.4 $\times$  training cost reduction (memory and training time). Compared to the vanilla MAE [20], the proposed NoR-MAE algorithm improve the performance of the lightweight vision transformer with **only  $\leq 8\%$  memory and training time overhead**.

Table 11. Training cost comparison between the proposed NoR-MAE and vanilla MAE on a cloud GPU server.

| ViT-Tiny                    | Batch Size  | Total GPU Memory | Time / Epoch                                   | Cost / Epoch    |
|-----------------------------|-------------|------------------|------------------------------------------------|-----------------|
| MAE (75% Spars.)            | 4096        | 102 GB           | 25 min 20 sec (1.0 $\times$ )                  | 2.69 USD        |
| MAE (50% Spars.)            | 4096        | 127 GB           | 33 min 07 sec (1.30 $\times$ )                 | 3.50 USD        |
| <b>NoR-MAE (75% Spars.)</b> | <b>4096</b> | <b>108 GB</b>    | <b>27 min 10 sec (1.08<math>\times</math>)</b> | <b>2.90 USD</b> |

To solidify resource usage, **we report the model on a leased cloud server** with 2 $\times$ H100 GPUs (\$6.38/hour), as shown in Table 11 above.

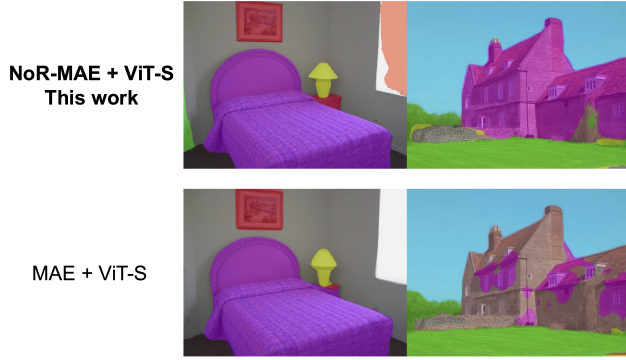

Figure 9. Improved segmentation quality with the proposed NoR-MAE algorithm.

## 10. NoR-MAE for Segmentation

In addition to the quantitative segmentation results reported in Section 4, we validate the downstream performance of the proposed NoR-MAE with qualitative demonstration with the ADE20K dataset. We follow the default settings of MAE [20] and employ the UperNet [35] and fine-tune the NoR-MAE-pretrained ViT-Small model for 100 epochs.

Compared to the vanilla MAE [20], the proposed NoR-MAE exhibits clearer segmentation among multiple objects within the given scene, as shown in Figure 9.

## 11. Experimental Setup

**Pretraining on the ImageNet dataset** We follow the standard pre-training protocol from the vanilla MAE to initiate the pre-training of the proposed NoR-MAE on ImageNet-1K and ImageNet-100 datasets. Specifically, we choose the default base learning rate as  $1.5e-4$  with weight decay = 0.05. The vision transformer models are trained by 200 and 400 epochs (include 40 epochs of warmup) with batch size of 4096.

**End-to-end Fine-tuning** The end-to-end fine-tuning follows the standard supervised learning of supervised ViT training. We use the base learning rate as  $1e-3$ , with the weight decay of 0.05. Following the setup of the vanilla MAE [20], we employ label smoothing, mixup, and cutmix for supervised fine-tuning.

**Downstream Fine-tuning** We follow the fine-tuning settings in [13] and fine-tune the pre-trained model for 10,000 steps with SGD and batch size of 64. The learning rate is set to 0.1 with no weight decay. The input samples are resized to  $224 \times 224$  to maintain the dimensionality as the pre-trained model.
